# Supplementary material for: Hydrothermal syntheses, crystal structures and magnetic properties of two copper(ii) complexes involved in situ ligand synthesis
Source: Royal Society of Chemistry journal article supplement (doi:10.1039/b704327a), 2007-01-01
Supplement: b704327a.pdf [file b704327a.pdf]

**Supporting Information:**

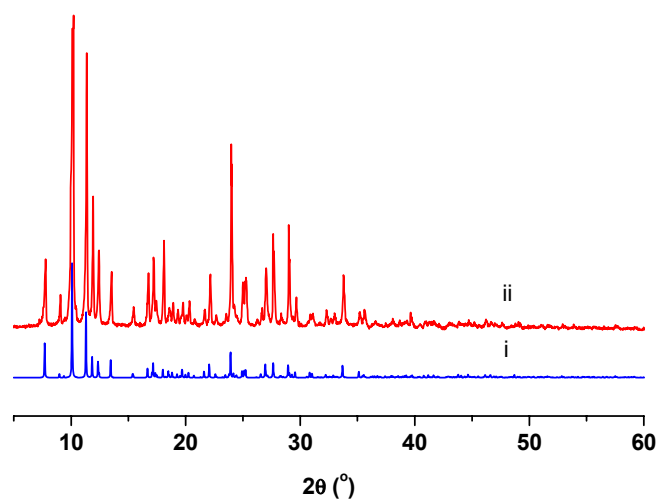

(a)

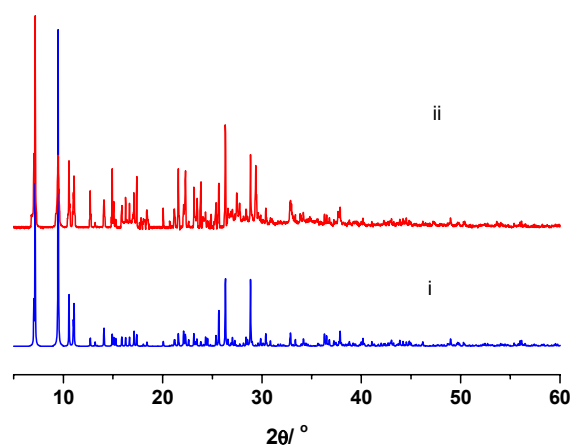

(b)

**Fig. S1** Simulated (i) and experimental (ii) X-ray powder diffraction patterns for **1** and **2**.
